# Supplementary material for: Studies of α-Helicity and Intersegmental Interactions in Voltage-Gated Na+ Channels: S2D4
Source: PLoS One. 2009 Nov 2;4(11):e7674. doi: 10.1371/journal.pone.0007674 (PMC2766034; doi:10.1371/journal.pone.0007674)
Supplement: Appendix S1 — (0.15 MB DOC) [file pone.0007674.s001.doc]

**Appendix S1:**

**Table A. Gating Properties (G-V) of WT and S2D4 or S2-S3D4 Segment Mutants of Nav1.4 z (e0) (kcal/mol) (kcal/mol)**

| Channel | (mV) | z (e0) | (kcal/mol) | (kcal/mol) |
| --- | --- | --- | --- | --- |
| WT (11) | -31.4±1.04 | 4.04±0.10 | -2.94±0.17 |  |
| I1377C (9) | -32.0±1.19 | 4.32±0.16 | -3.21±0.22 | -0.27±0.24 |
| L1378C (10) | -32.8±1.08 | 4.25±0.11 | -3.22±0.17 | -0.28±0.15 |
| Y1379C (10) | -32.2±1.60 | 4.13±0.17 | -3.09±0.26 | -0.14±0.28 |
| N1380C (8) | -32.0±1.03 | 4.25±0.12 | -3.13±0.13 | -0.18±0.17 |
| I1381C (9) | -33.6±1.76 | 3.91±0.20 | -3.06±0.31 | -0.11±0.33 |
| N1382C (5) | -30.5±1.17 | 4.36±0.17 | -3.10±0.19 | -0.15±0.21 |
| M1383C (7) | -30.9±1.03 | 4.10±0.11 | -2.93±0.19 | 0.01±0.21 |
| V1384C (4) | -34.1±1.39 | 4.00±0.20 | -3.19±0.25 | -0.24±0.30 |
| F1385C (6) | -33.2±2.24 | 3.84±0.17 | -2.93±0.31 | -0.02±0.33 |
| I1386C (4) | -33.9±1.11 | 4.26±0.15 | -3.34±0.21 | -0.39±0.27 |
| I1387C (6) | -30.6±0.94 | 4.27±0.14 | -3.03±0.18 | -0.08±0.24 |
| I1388C (5) | -31.8±1.71 | 4.05±0.19 | -2.98±0.25 | -0.03±0.27 |
| F1389C (4) | -35.4±1.32 | 4.22±0.29 | -3.45±0.32 | -0.51±0.35 |
| T1390C (4) | -29.7±1.72 | 4.17±0.29 | -2.89±0.30 | -0.05±0.32 |
| G1391C (5) | -32.6±1.44 | 4.37±0.19 | -3.31±0.28 | -0.36±0.31 |
| E1392C (15) | -29.6±1.21 | 4.35±0.19 | -2.99±0.23 | -0.05±0.26 |
| C1393Q (5) | -30.9±1.55 | 4.11±0.16 | -2.92±0.16 | 0.02±0.23 |
| C1393W (4) | -30.0±1.70 | 3.69±0.18 | -2.58±0.24 | 0.36±0.27 |
| V1394C (10) | -32.2±1.07 | 4.30±0.08 | -3.19±0.09 | -0.25±0.21 |
| L1395C (6) | -31.2±1.13 | 4.26±0.14 | -3.09±0.21 | -0.15±0.24 |
| K1396C (15) | -29.7±1.92 | 4.16±0.31 | -2.89±0.35 | -0.06±0.39 |
| M1397C (11) | -31.8±1.03 | 4.31±0.12 | -3.09±0.17 | -0.15±0.23 |
| F1398C (7) | -32.1±0.82 | 4.07±0.16 | -3.01±0.16 | -0.07±0.23 |
| A1399C (4) | -34.0±2.80 | 3.91±0.20 | -3.08±0.39 | -0.14±0.42 |
| R1401C (5) | -30.26±1.05 | 4.11±0.21 | -2.87±0.18 | 0.07±0.25 |
| F1405C (7) | -31.8±0.63 | 3.97±0.13 | -2.91±0.12 | 0.03±0.20 |
| W1409C (5) | -32.5±1.17 | 4.10±0.13 | -3.07±0.13 | -0.13±0.21 |
| L1378C (4) ‡ | -29.9±1.84 | 4.44±0.13 | -3.08±0.27 | -0.14±0.31 |
| N1382C (7) ‡ | -33.7±1.15 | 4.76±0.13 | -3.78±0.21 | -0.62±0.29 |

The first column shows the residue number, identity in WT channel, the nature of the mutation, and, in parentheses, the number of cells. Native cysteine was mutated to tryptophan and glutamine. *V0.5* (midpoint potential) and z (equivalent charge) were obtained from fits to single Boltzmann equations (Fig. 1). The free energy difference at 0 mV between closed and open states () was calculated as described in Materials and Methods. The difference between WT and mutant values is . ‡MTSET (0.5 mM) is applied extracellularly. Data are mean values ± SEM.

**Appendix S1:**

**Table B. Gating Properties (h-V) of WT and S2D4 or S2-S3D4 Segment Mutants of Nav**1.4

| Channel | | (mV) | z (e0) | (kcal/mol) | | (kcal/mol) | |  | | |  | |
| --- | --- | --- | --- | --- | --- | --- | --- | --- | --- | --- | --- | --- |
|  | WT (11) | -72.2±0.58 | 5.85±0.10 | | -9.77±0.18 | |  | | 0.41±0.01 | 9.52±0.47 | |  |
|  | I1377C (9) | -71.0±0.89 | 5.69±0.11 | | -9.32±0.17 | | 0.44±0.27 | | 0.40±0.06 | 9.67±0.57 | |  |
|  | L1378C (10) | -71.7±0.66 | 5.57±0.18 | | -9.21±0.33 | | 0.57±0.35 | | 0.43±0.05 | 10.8±0.68 | |  |
|  | Y1379C (10) | -70.1±0.92* | 5.53±0.12* | | -8.93±0.24* | | 0.84±0.29 | | 0.36±0.01* | 7.07±0.37* | |  |
|  | N1380C (8) | -70.8±0.86 | 5.86±0.10 | | -9.57±0.11 | | 0.21±0.20 | | 0.38±0.01 | 10.6±0.98 | |  |
|  | I1381C (9) | -73.6±0.53 | 5.66±0.14 | | -9.59±0.21 | | 0.18±0.27 | | 0.44±0.04 | 11.3±0.64 | |  |
|  | N1382C (5) | -62.4±1.09** | 4.58±0.34** | | -6.74±0.42** | | 3.03±0.46 | | 0.64±0.07* | 4.96±0.08** | |  |
|  | M1383C (7) | -70.2±1.13 | 5.79±0.16 | | -9.37±0.25 | | 0.40±0.31 | | 0.39±0.01 | 9.02±0.88 | |  |
|  | V1384C (4) | -73.2±1.15 | 5.84±0.09 | | -9.85±0.12 | | -0.08±0.21 | | 0.40±0.05 | 9.74±0.46 | |  |
|  | F1385C (6) | -78.2±0.92** | 5.55±0.12 | | -10.01±0.20 | | -0.23±0.27 | | 0.28±0.04* | 12.2±0.71* | |  |
|  | I1386C (4) | -65.9±0.57** | 5.27±0.05** | | -8.01±0.07** | | 1.77±0.19 | | 0.67±0.03** | 2.67±0.43** | |  |
|  | I1387C (6) | -71.8±1.35 | 5.91±0.15 | | -9.77±0.14 | | 0.01±0.22 | | 0.36±0.02 | 10.5±0.55 | |  |
|  | I1388C (5) | -70.6±1.65 | 5.75±0.09 | | -9.35±0.09 | | 0.42±0.20 | | 0.40±0.01 | 8.74±1.19 | |  |
|  | F1389C (4) | -69.3±0.90* | 4.79±0.18** | | -7.67±0.30** | | 2.11±0.34 | | 0.63±0.04** | 5.48±0.74** | |  |
|  | T1390C (4) | -63.1±1.04** | 5.86±0.11 | | -8.54±0.36* | | 1.23±0.39 | | 0.45±0.02* | 4.51±0.27** | |  |
|  | G1391C (5) | -71.6±1.11 | 5.72±0.10 | | -9.45±0.18 | | 0.32±0.25 | | 0.39±0.12 | 8.36±1.09 | |  |
|  | E1392C (7) | -62.0±1.05** | 4.65±0.14** | | -6.70±0.28** | | 3.09±0.33 | | 1.24±0.09** | 3.21±0.13** | |  |
|  | C1393Q (5) | -70.1±1.09 | 5.67±0.29 | | -9.13±0.33 | | 0.64±0.37 | | 0.55±0.05 | 10.7±1.15 | |  |
|  | C1393W (4) | -74.0±1.21 | 5.39±0.18 | | -9.25±0.49 | | 0.52±0.27 | | 0.47±0.05 | 12.1±2.04 | |  |
|  | V1394C (10) | -71.8±0.79 | 5.88±0.05 | | -9.73±0.03 | | 0.05±0.18 | | 0.41±0.01 | 9.91±1.65 | |  |
|  | L1395C (6) | -70.7±0.81 | 5.99±0.16 | | -9.79±0.26 | | -0.02±0.31 | | 0.35±0.02 | 9.98±0.07 | |  |
|  | K1396C (15) | -64.4±0.62** | 5.59±0.08* | | -8.33±0.16** | | 1.16±0.23 | | 0.57±0.02** | 3.42±0.33** | |  |
|  | M1397C (11) | -72.0±0.73 | 5.93±0.14 | | -9.82±0.15 | | -0.04±0.34 | | 0.37±0.02 | 11.6±2.18 | |  |
|  | F1398C (7) | -73.0±0.87 | 5.91±0.11 | | -9.98±0.29 | | -0.21±0.11 | | 0.35±0.02 | 11.6±1.53 | |  |
|  | A1399C (4) | -73.3±1.12 | 5.66±0.13 | | -9.58±0.39 | | 0.19±0.18 | | 0.38±0.05 | 10.7±1.44 | |  |
|  | L1400C (12) | -72.2±0.81 | 5.69±0.09 | | -9.50±0.15 | | 0.27±0.23 | | 0.48±0.05 | 11.6±0.48 | |  |
|  | R1401C (5) | -70.0±1.12 | 5.89±0.15 | | -9.54±0.35 | | 0.23±0.39 | | 0.40±0.04 | 9.78±1.08 | |  |
|  | F1405C (7) | -71.5±0.33 | 5.64±0.08 | | -9.28±0.10 | | 0.42±0.19 | | 0.37±0.04 | 10.6±0.68 | |  |
|  | W1409C (5) | -71.9±0.48 | 5.72±0.18 | | -9.47±0.27 | | 0.29±0.32 | | 0.39±0.06 | 9.61±0.98 | |  |
|  | L1378C (4)‡ | -58.2±1.20** | 4.63±0.25** | | -6.23±0.46** | | 2.97±0.57 | | 1.27±0.05** | 2.60±1.21** | |  |
|  | N1382C (7)‡ | -56.0±0.81** | 4.03±0.16* | | -5.20±0.11** | | 1.54±0.44 | | 1.01±0.05** | 2.94±0.11* | |  |

The first column shows the residue number, identity in WT channel, the nature of the mutation, and, in parentheses, the number of cells. Native cysteine was mutated to tryptophan and glutamine. *V0.5* (midpoint potential) and z (equivalent charge) were obtained from fits to single Boltzmann equations (Fig. 2). The free energy difference at 0 mV between closed and inactivated states (ΔGo) was calculated as described in Materials and Methods. The difference between WT and mutant values is ΔΔGo. The current decay time constants (τh) were obtained by fitting the current decays to a single exponential for each voltage and the voltage-dependence was determined by fitting to a voltage-dependent exponential (Materials and Methods): τho is the τh value at 0 mV. τrec-90 is the time constant for recovery from the fast inactivation at -90 mV. ‡MTSET (0.5 mM) is applied extracellularly. Data are mean values ± SEM. * represents student’s t-test is significant compared to WT (P<0.05), ** P<0.005. Data are mean values ± SEM.

**Appendix S**

**Table C. The Rate Constants of WT and S2D4 Segment Mutants of rNav1.4 for Entry Into and Exit From the Fast Inactivated State.**

|  | | (1/ms) | |  | | (1/ms) | | |  | ΔGα0‡ (kcal/mol) | | | ΔGβ0‡. (kcal/mol) | ΔΔGα0‡ (kcal/mol) | | | ΔΔGβ0‡. (kcal/mol) | |
| --- | --- | --- | --- | --- | --- | --- | --- | --- | --- | --- | --- | --- | --- | --- | --- | --- | --- | --- |
|  | WT (11) | | 3.5 | | 2.8 | | 10 | 2.25 | | | 20.93 | 12.07 | | |  |  | |  |
|  | I1377C (9) | | 3.65 | | 2.8 | | 10.5 | 2.4 | | | 20.9 | 12.04 | | | -0.03 | -0.03 | |  |
|  | L1378C (10) | | 3.45 | | 2.8 | | 10.4 | 2.3 | | | 20.93 | 12.04 | | | 0.01 | -0.02 | |  |
|  | Y1379C(10) | | 7.5 | | 2.85 | | 5 | 2.45 | | | 20.47 | 12.48 | | | -0.45 | 0.41 | |  |
|  | N1380C (8) | | 3.55 | | 2.75 | | 10.5 | 2.45 | | | 20.92 | 12.04 | | | -0.01 | -0.03 | |  |
|  | I1381C (9) | | 3.6 | | 2.75 | | 9.5 | 2.25 | | | 20.91 | 12.1 | | | -0.02 | 0.03 | |  |
|  | N1382C (5) | | 25 | | 2.45 | | 3.5 | 2.35 | | | 19.75 | 12.69 | | | -1.17 | 0.63 | |  |
|  | M1383C (7) | | 3.55 | | 2.8 | | 11.5 | 2.35 | | | 20.92 | 11.99 | | | -0.01 | -0.08 | |  |
|  | V1384C (4) | | 3.3 | | 2.75 | | 10.5 | 2.35 | | | 20.96 | 12.04 | | | 0.04 | -0.03 | |  |
|  | F1385C (6) | | 2 | | 2.8 | | 12.5 | 2.25 | | | 20.26 | 11.94 | | | 0.33 | -0.13 | |  |
|  | I1386C (4) | | 10 | | 2.85 | | 3.5 | 2.25 | | | 20.3 | 12.69 | | | -0.63 | 0.63 | |  |
|  | I1387C (6) | | 3.65 | | 2.75 | | 11 | 2.35 | | | 20.9 | 12.01 | | | -0.03 | -0.06 | |  |
|  | I1388C (5) | | 3.55 | | 2.75 | | 9.5 | 2.25 | | | 20.92 | 12.1 | | | -0.01 | 0.03 | |  |
|  | F1389C (4) | | 7 | | 2.7 | | 4.5 | 2.25 | | | 20.51 | 12.54 | | | -0.41 | 0.48 | |  |
|  | T1390C (4) | | 7.5 | | 2.8 | | 5.5 | 2.25 | | | 20.47 | 12.42 | | | -0.45 | 0.36 | |  |
|  | G1391C (5) | | 3.5 | | 2.8 | | 10 | 2.25 | | | 20.93 | 12.07 | | | 0 | 0 | |  |
|  | E1392C (15) | | 20 | | 2.4 | | 2 | 2.25 | | | 19.75 | 12.79 | | | -1.17 | 0.72 | |  |
|  | C1393 Q(5) | | 3.65 | | 2.65 | | 9.5 | 2.65 | | | 20.9 | 12.1 | | | -0.03 | 0.03 | |  |
|  | C1393 W(4) | | 3.55 | | 2.65 | | 9.5 | 2.25 | | | 20.92 | 12.1 | | | -0.01 | 0.03 | |  |
|  | V1394C(10) | | 3.4 | | 2.7 | | 9.5 | 2.35 | | | 20.94 | 12.1 | | | 0.02 | 0.03 | |  |
|  | L1395C (6) | | 3.7 | | 2.7 | | 9.8 | 2.45 | | | 20.89 | 12.08 | | | -0.03 | 0.01 | |  |
|  | K1396C(15) | | 15 | | 2.65 | | 4.5 | 2.15 | | | 20.06 | 12.54 | | | -0.87 | 0.48 | |  |
|  | M1397C(11) | | 3.45 | | 2.65 | | 9.6 | 2.45 | | | 20.93 | 12.09 | | | 0.01 | 0.02 | |  |
|  | F1398C (7) | | 3.7 | | 2.65 | | 11 | 2.45 | | | 20.89 | 12.01 | | | -0.03 | -0.06 | |  |
|  | A1399C (4) | | 3.55 | | 2.75 | | 10.8 | 2.35 | | | 20.92 | 12.02 | | | -0.01 | -0.05 | |  |
|  | L1400 (12) | | 3.5 | | 2.75 | | 10.5 | 2.35 | | | 20.93 | 12.04 | | | 0.01 | -0.03 | |  |

The first column shows the residue number, identity in WT channel, the nature of the mutation, and, in parentheses, the number of cells. Native cysteine was mutated to glutamine and tryptophan. 0 and 0 represent the voltage-dependent rate constants for leaving and entering an inactivated state at 0 mV, respectively. *z* and *z* were equivalent charge in the gating proceeds for leaving and entering an inactivated state, respectively. ΔΔGβ0‡ is the difference in the free energy between the transition state and the resting/close state at 0 mV, and ΔΔGα0‡ is the difference in the free energy between the transition state and the inactivated state at 0 mV, which were calculated as described in Materials and Methods. The differences between WT and mutant values are ΔΔGα0‡ and ΔΔGβ0‡. Data are mean values ± SEM.
